# Supplementary material
Source: Research Square preprint supplement (doi:10.21203/rs.3.rs-8886358/v1)
Supplement: Supplementary file 1 [file 76094da20a28a0e366eead19.docx]

**Supplementary Material**

**Fig 1.** Model of the first-order multiple confirmatory factor analysis for the cancer screening perception scale

Note: F1: Perceived Severity. F2: Perceived Susceptibility, F3: Perceived Benefits, F4: Perceived Barriers, F5: Cues for Action.

**Fig. 2.** Model of the breast cancer fear scale single-factor confirmatory factor analysis

Note: BCFS: Breast Cancer Fear Scale
